# Supplementary material
Source: PubMed Central journal article supplement (PMC6842445)
Supplement: NIHMS1538558-supplement-1.pdf [file NIHMS1538558-supplement-1.pdf]

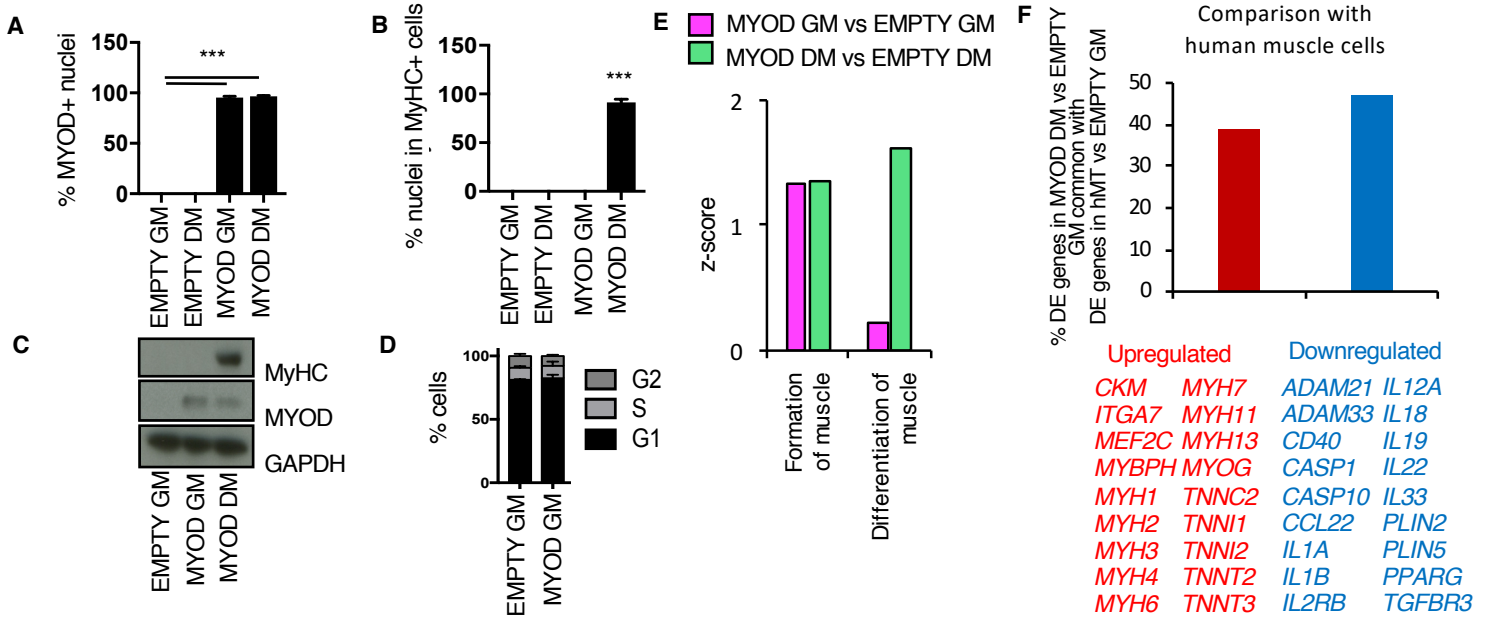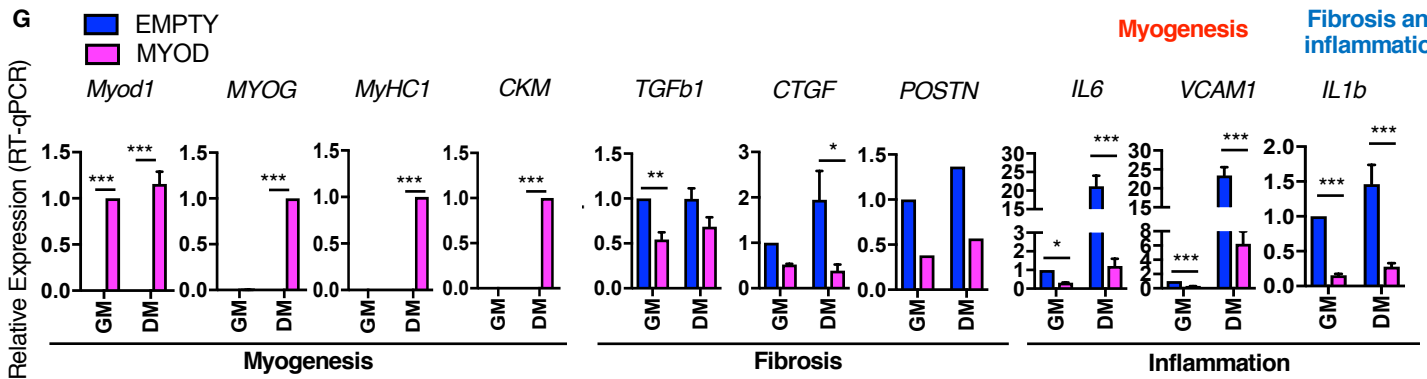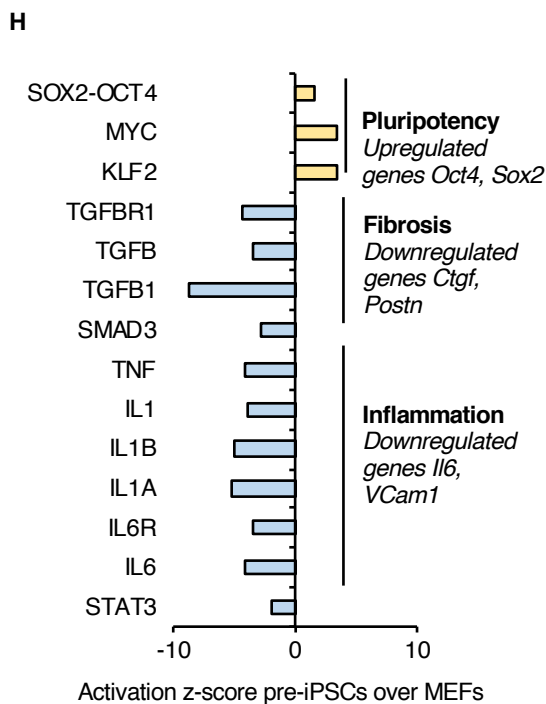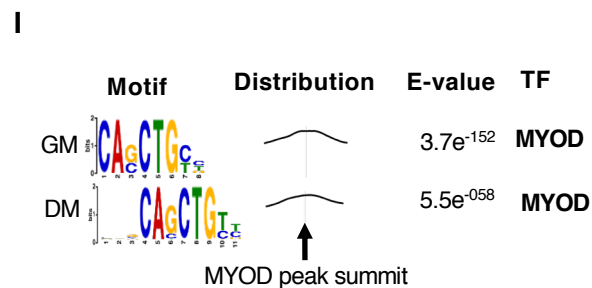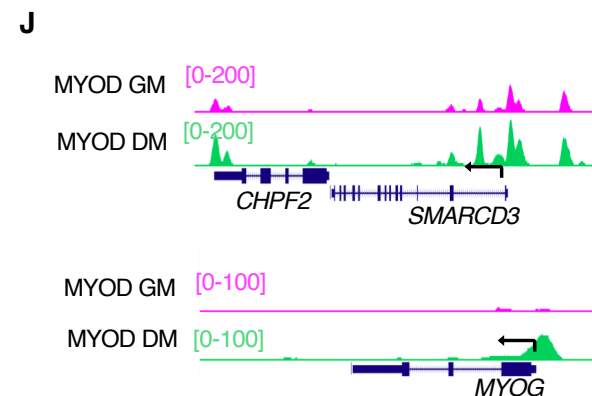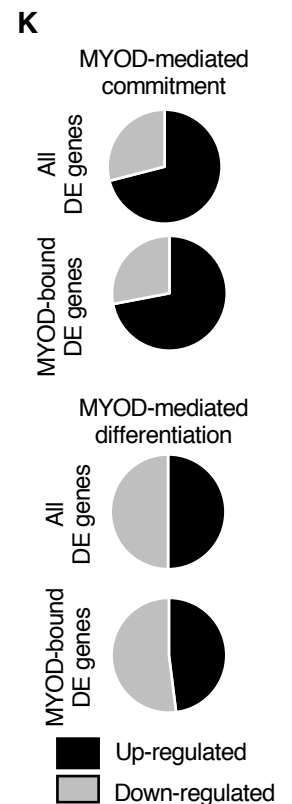

**Figure S1. Related to Figure 1. Master transcription factor-driven transcription reprogramming and chromatin binding.**

**A**, Percentage of MYOD-positive nuclei. (n=3). Data are represented as mean +/- standard error of the mean (SEM). Two-way ANOVA was used for statistical analysis, corrected for multiple testing (Tukey), \*\*\* p<0.001.

**B**, Percentage of nuclei in MyHC positive cells. (n=3). Data are represented as mean +/- standard error of the mean (SEM). Two-way ANOVA was used for statistical analysis, corrected for multiple testing (Tukey), \*\*\* p<0.001.

**C**, Immunoblot analysis of the whole cell lysate (left). Data is represented as mean +/- SEM.

**D**, Cell cycle analysis (n=3). Data is represented as mean +/- SEM.

**E**, Selected biological functions enriched by MYOD comparing MYOD GM vs EMPTY GM and MYOD DM vs EMPTY DM (IPA).

**F**, Percentage of up- or down-regulated genes in MYOD DM vs EMPTY GM that are common to up- or down-regulated genes in hMT vs EMPTY GM.

**G**, Relative expression of muscle, fibrotic and inflammatory genes (n=2-4) by RT-qPCR. Data is represented as mean +/- SEM. Two-way ANOVA was used for statistical analysis, corrected for multiple testing (Tukey), \* p<0.05, \*\* p<0.01, \*\*\* p<0.001.

**H**, Upstream prediction analysis by IPA based on the gene expression profile of MEFs and MEF-derived iPSCs. All categories have p< 1x10<sup>-7</sup>.

**I**, E-box motif enrichment (left) and distribution (right) at +/-50bp from MYOD peak summit, in GM (top) and DM (bottom).

**J**, UCSC snapshot of MYOD ChIP-seq in MYOD GM and in MYOD DM on *SMARCD3* (top) or *MYOG* (bottom) loci.

**K**, Percentage of up- (black) or down- (grey) regulated genes during commitment and differentiation (All DE genes). Percentage of MYOD-bound up- or down-regulated genes during commitment and differentiation (MYOD-bound DE genes).

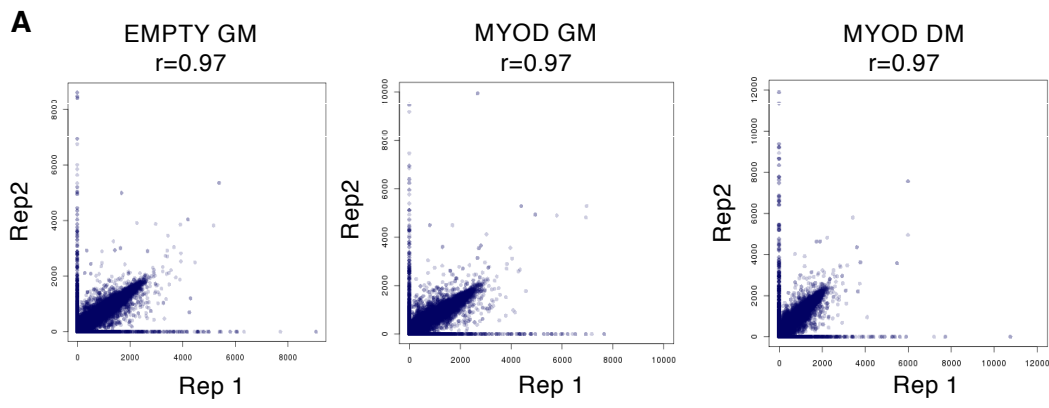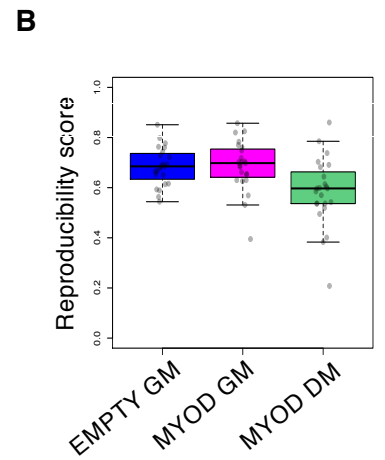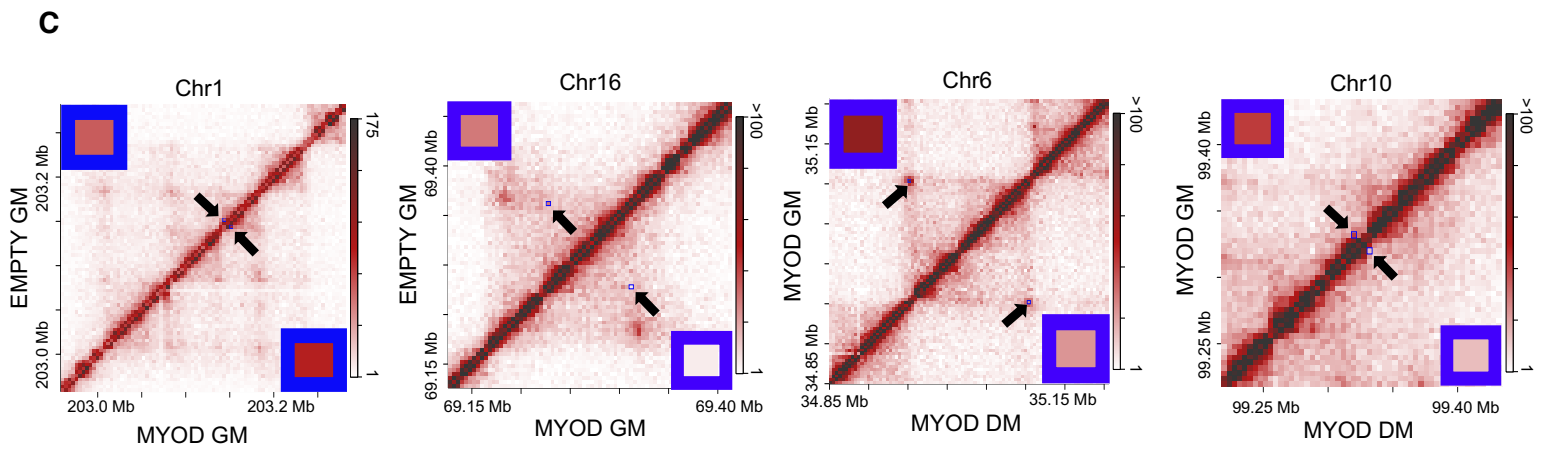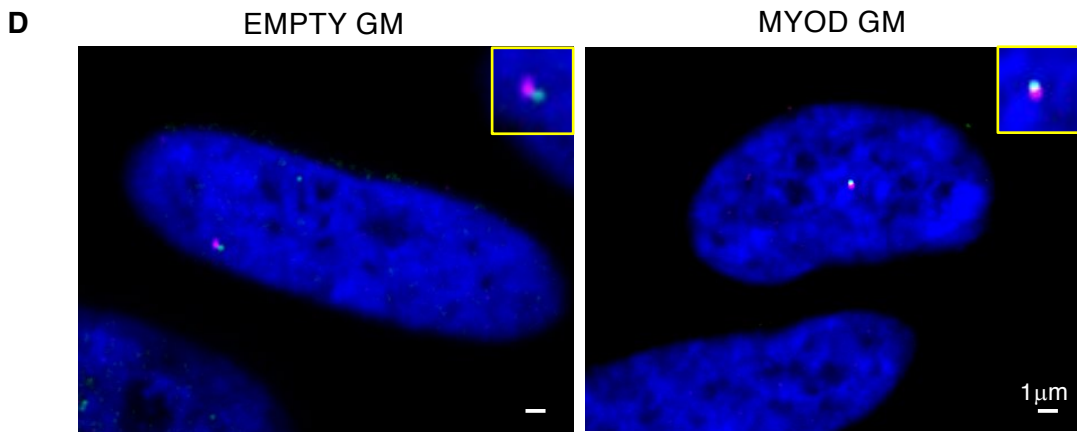

**Figure S2. Related to Figure 2. Hi-C Reproducibility and examples of differential interactions.**

**A,** Scatter plot representing reproducibility of two biological replicates as in Dixon et al, 2012.

**B.** Reproducibility score of intra-chromosomal Hi-C contact matrices among biological replicates calculated using HiC-spector. Each chromosome is represented as a single circle.

**C,** Normalized Hi-C contact heatmaps for EMPTY GM (top left) vs MYOD GM (bottom right), and for MYOD GM (top left) vs MYOD DM (bottom right). Interaction under investigation is highlighted by blue boxes. Magnification of the blue boxes is shown on the corners of each heatmap.

**D,** Left: illustrative images of DNA FISH for two probes (green and red) spanning 100kb regions centered around two 4kb regions that differentially interacted with each other between EMPTY GM and MYOD GM. DNA is stained with Hoechst. Right: distance between DNA FISH probes.

**A**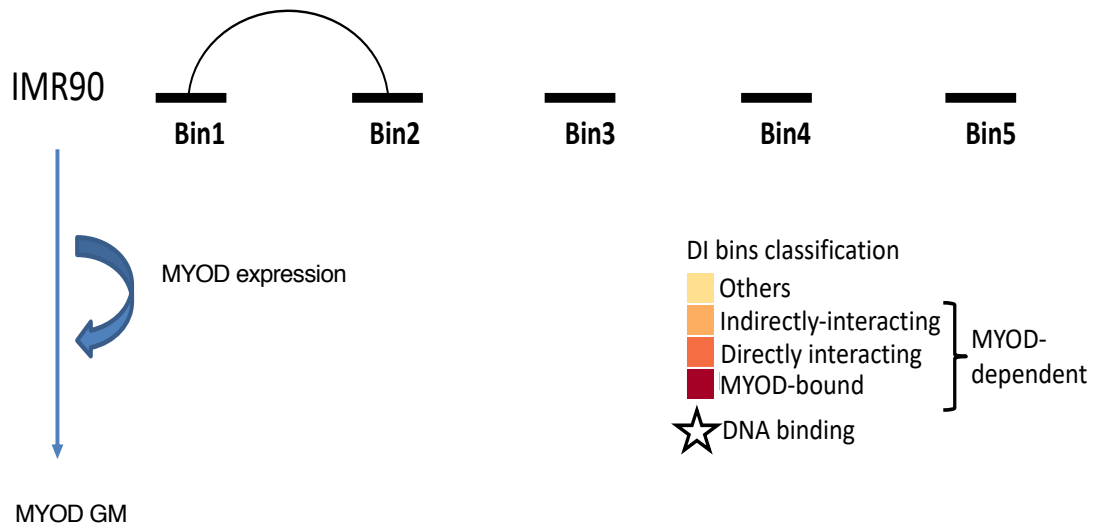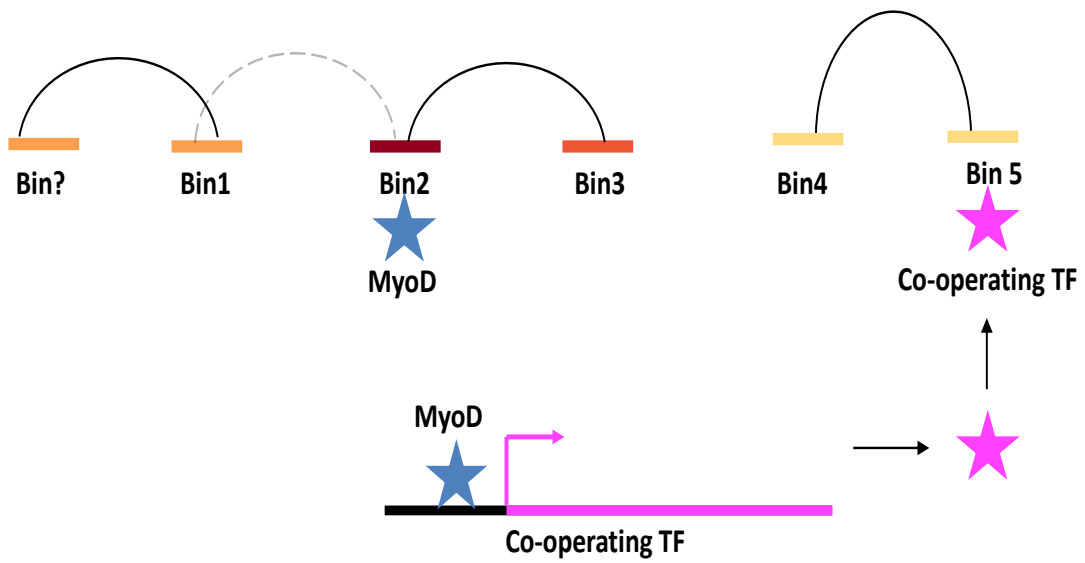**B**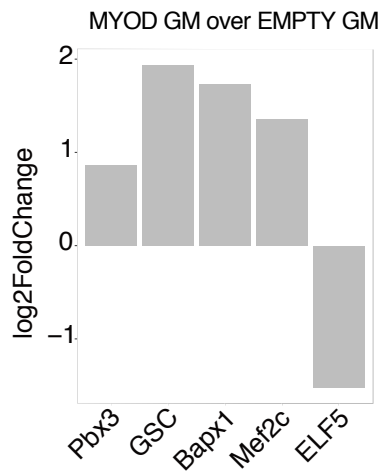**C**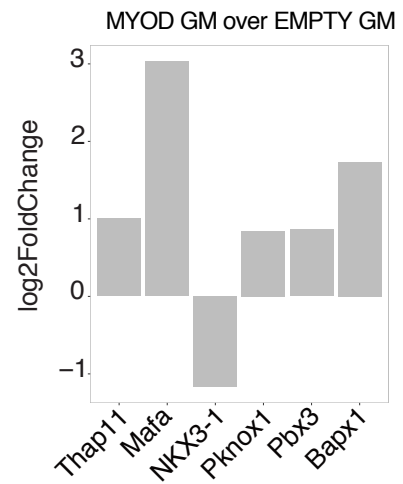

**Figure S3. Related to Figure 2. MYOD-domino effect of differential interactions.**

**A**, Schematic representation of MYOD-domino effect on differential chromatin interactions.

**B**, Differential gene expression by RNA-seq of TFs whose DNA binding motif is present around the TSS located inside directly interacting bins (left). The directly interacting bins refer to Fig 2F EMPTY GM vs MYOD GM.

**C**, Differential gene expression by RNA-seq of TFs whose DNA binding motif is present around the TSS contained within indirectly-interacting bins and other bins (right). indirectly-interacting bins and other bins refer to Fig 2F EMPTY GM vs MYOD GM.

**A**

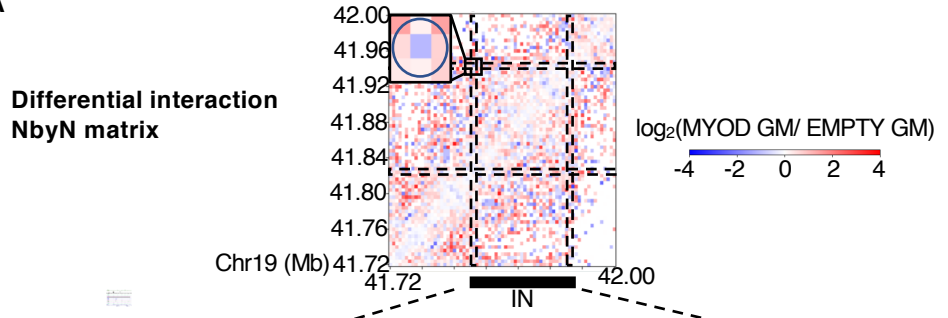

**B**

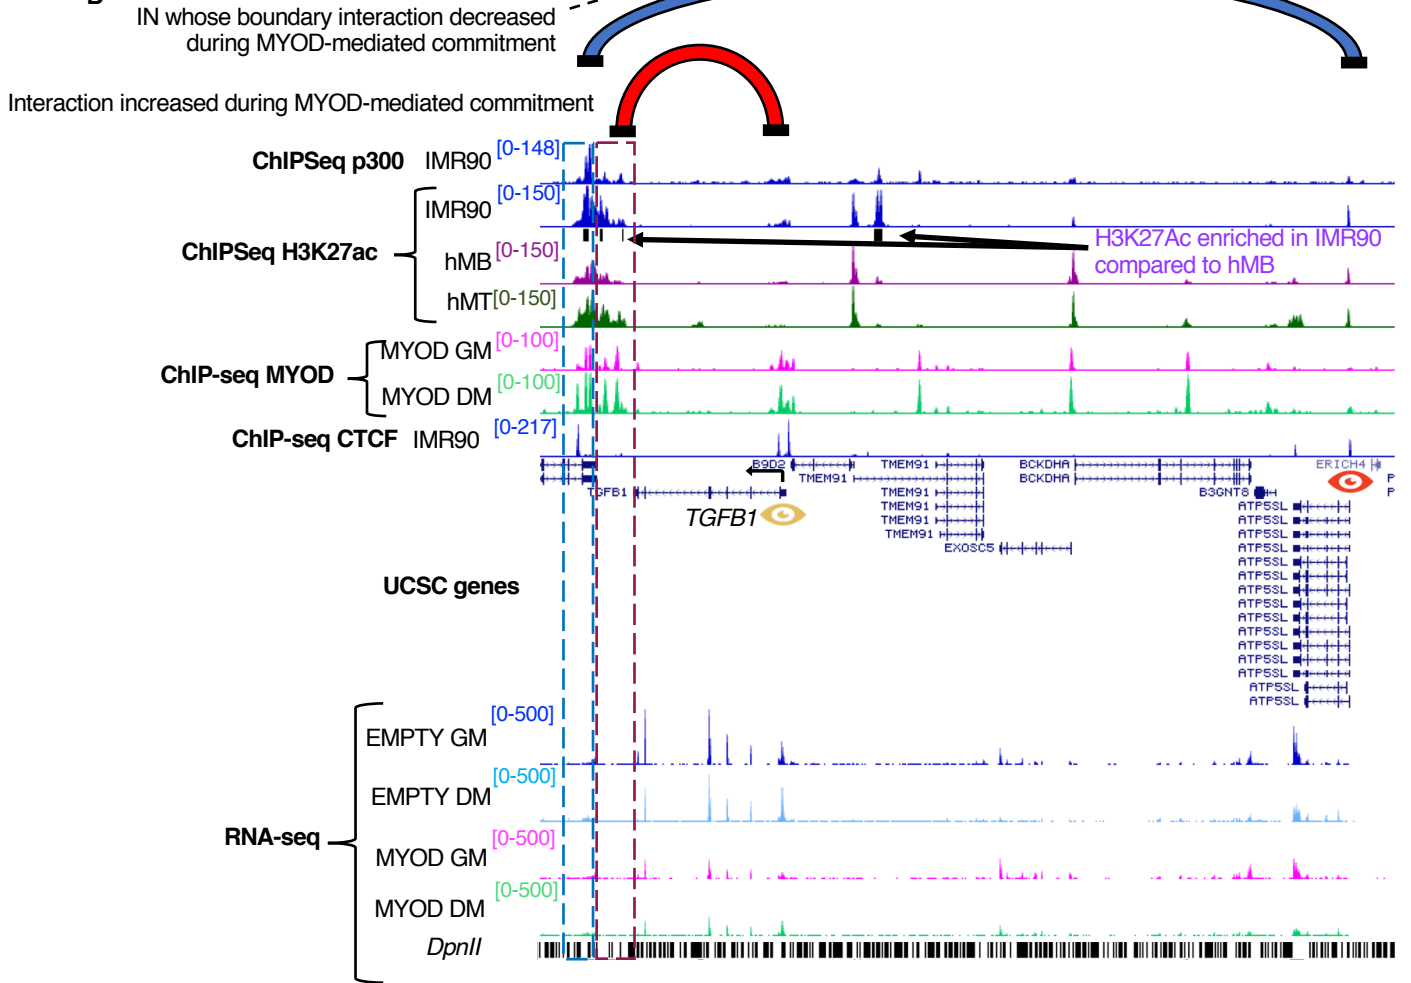

**C**

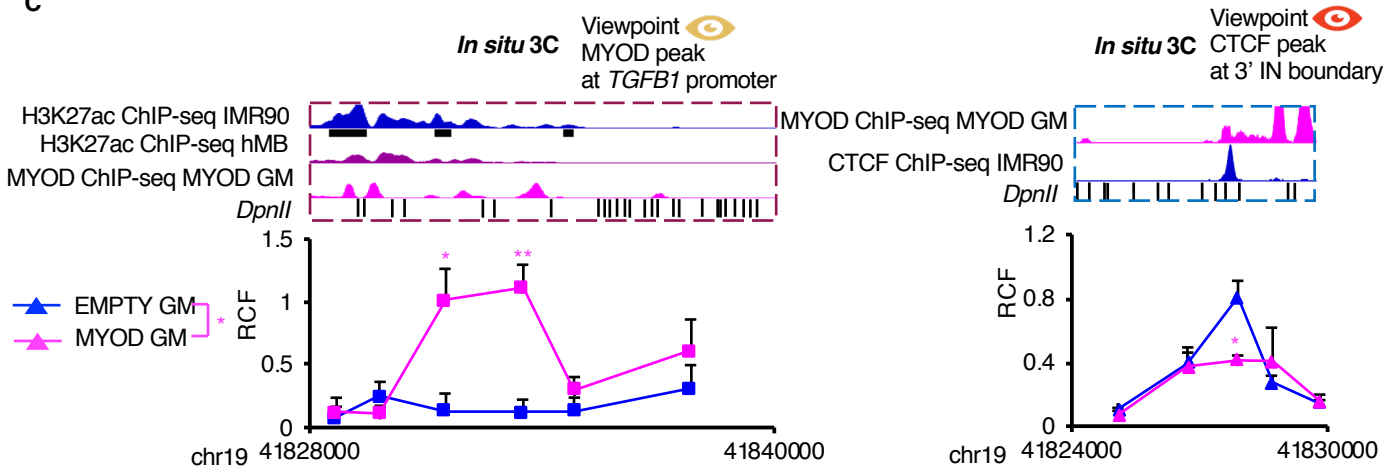

**Figure S4. Related to Figure 4. 3D Regulation of *TGF-β1* Expression.**

**A**, Differential interaction NbyN map of *TGF-β1* locus and location of altered IN during MYOD-mediated commitment (black bar).

**B**, From top to bottom: blue arch representing decreased interaction between two IN boundaries (CTCF-bound bins) during MYOD-mediated commitment, red arch representing an increased interaction during MYOD-mediated commitment, UCSC snapshot of p300 ChIP-seq in IMR90 (blue), H3K27ac ChIP-seq in IMR90 (blue), H3K27ac ChIP-seq peaks enriched in IMR90 as compared to hMB and hMT (black bars), H3K27Ac ChIP-Seq in hMB, H3K27Ac ChIP-Seq in hMT, MYOD ChIP-seq in MYOD GM (magenta) and MYOD DM (light green), CTCF ChIP-seq in IMR90 (blue), RefSeq genes from UCSC browser, RNASeq of EMPTY GM (blue), EMPTY DM (light blue), MYOD GM (magenta), MYOD DM (light green). DpnII digestion sites (black)

**C**, Left: Close up representation of the DNA regions delimited by violet dashed box in (B), from top to bottom: H3K27ac ChIP-seq in IMR90 (blue) and hMB (violet), MYOD ChIP-seq in MYOD GM (magenta), DpnII sites, relative crosslinking frequencies (RCF) by in situ 3C using as view point MYOD peak at *TGF-β1* promoter (gold eye) and measuring RCF with DpnII fragments above. Right: Close up representation of the DNA regions delimited by blue dashed box in (B), from top to bottom: MYOD ChIP-seq in MYOD GM (magenta), CTCF ChIP-seq in IMR90 (blue) and DpnII sites. Relative crosslinking frequencies (RCF) by in situ 3C using as view point CTCF peak at IN boundaries containing *TGF-β1* (red eye) and measuring RCF with DpnII fragments above (n=3). 3C data is represented as mean + SEM. T-test was used for statistical analysis, \* p<0.05, \*\* p<0.01.



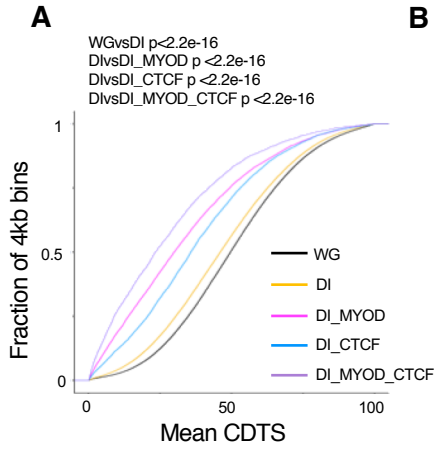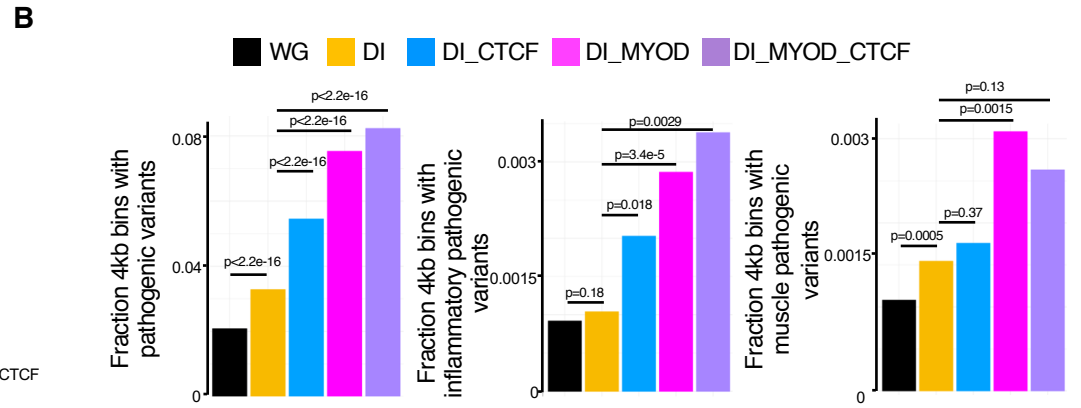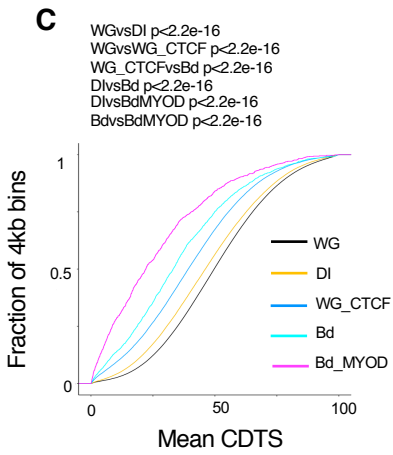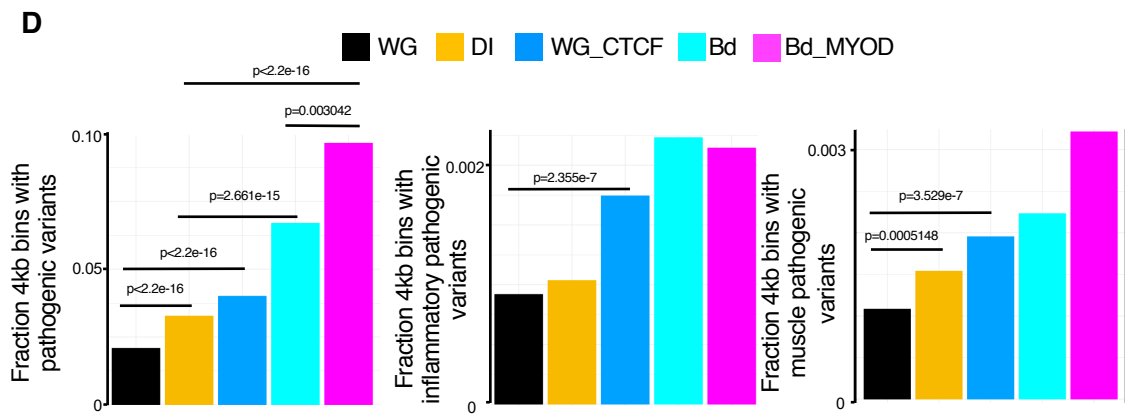

**Figure S5. Related to Figure 2 and 4. MYOD-bound differentially interacting elements are highly constraint and enriched in annotated pathogenic variants.**

**A**, DNA sequence constraint of all bins genome-wide bins (WG, black), differentially interacting bins (DI, yellow), MYOD-bound bins DI bins (DI\_MYOD, magenta), CTCF-bound DI bins (DI\_CTCF, light blue) or MYOD and CTCF bound DI bins (DI\_MYOD\_CTCF, purple). Two-sample Kolmogorov-Smirnov test was used for statistical analysis.

**B**, Fraction of genome-wide bins (WG, black), differentially interacting bins (DI, yellow), MYOD-bound bins DI bins (DI\_MYOD, magenta), CTCF-bound DI bins (DI\_CTCF, light blue) or MYOD and CTCF bound DI bins (DI\_MYOD\_CTCF, purple) harboring variants associated to all diseases (left), inflammatory diseases (middle) or muscle diseases (right). One sided Fisher's Exact Test was used for all statistical analysis in the figure.

**C**, DNA sequence constraint of all bins genome-wide (WG), differentially interacting bins (DI), CTCF-bound bins (WG\_CTCF), differentially interacting bins co-bound by CTCF (Bd), and differentially interacting bins co-bound by CTCF and bound by MYOD (Bd\_MYOD). Two-sample Kolmogorov-Smirnov test was used for statistical analysis.

**D**, Fraction of genome-wide (WG), differentially interacting bins (DI), CTCF-bound bins (WG\_CTCF), differentially interacting bins co-bound by CTCF (Bd), and differentially interacting bins co-bound by CTCF and bound by MYOD (Bd\_MYOD) harboring annotated pathogenic variants associated to all annotated diseases (left), inflammatory (middle) or muscle diseases (right). One sided Fisher's Exact Test was used for all statistical analysis in the figure.

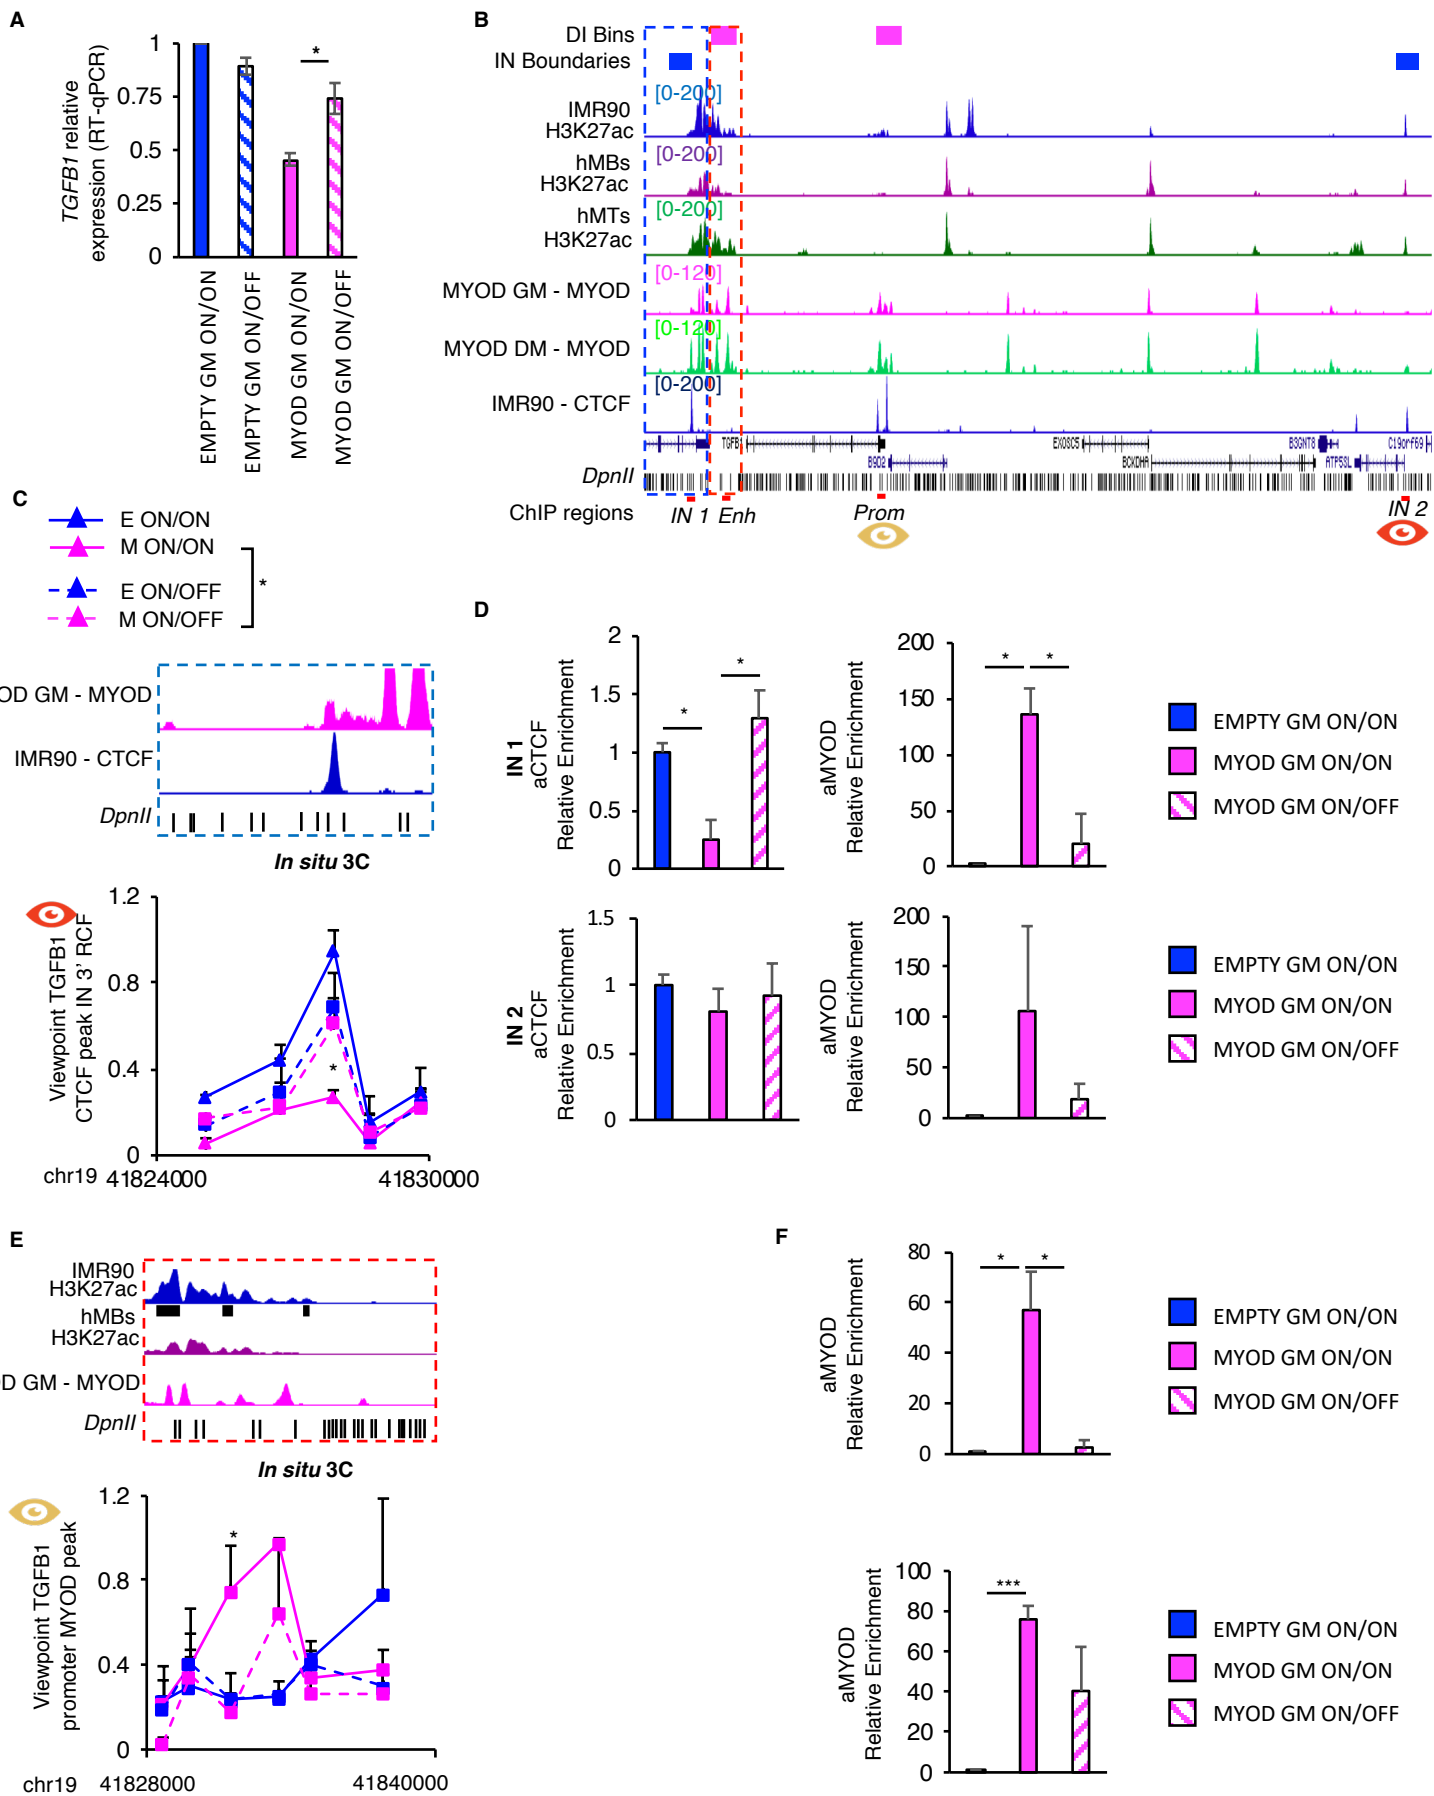

**Figure S6. Related to Figure 5. Requirement of *Myod1* expression for maintaining myogenic 3D interaction.**

**A**, Relative mRNA expression of *TGF- $\beta$ 1* compared to EMPTY ON/ON (n=3). Data is represented as mean +/- SEM.

**B**, From top to bottom: magenta boxes representing bins with an increased interaction during MYOD-mediated commitment; blue boxes representing bins with decreased interaction between two IN boundaries (CTCF-bound bins) during MYOD-mediated commitment; UCSC snapshot of H3K27ac ChIP-seq in IMR90 (blue), in hMBs (purple) and in hMTs (dark green); MYOD ChIP-seq in MYOD GM (magenta) and MYOD DM (light green); CTCF ChIP-seq in IMR90 (blue); RefSeq genes; DpnII digestion sites (black); regions analyzed by ChIP-qPCR; eyes are viewpoints for 3C experiments.

**C**, From top to bottom: UCSC snapshot of the same region that in panel (B) within dashed blue box, MYOD ChIP-seq in MYOD GM; CTCF ChIP-seq in IMR90; DpnII sites; RCF values between CTCF peak at 5' the region of an altered IN containing *TGF- $\beta$ 1* (view point – red eye – see panel B) and the CTCF peak at 3' region after 1 day of doxycycline treatment and 2 days with/out doxycycline treatment (ON/ON, ON/OFF). Data is represented as mean + SEM (n=3).

**D**, ChIP-qPCR analysis for CTCF, MYOD enrichment on the IN1 region (top panels) and on the IN2 region (bottom panels). Data are shown as relative enrichment to EMPTY ON/OFF, as mean +/- SEM (n=2).

**E**, From top to bottom: UCSC snapshot of the same region that in panel (B) within dashed red box, H3K27ac ChIP-seq in IMR90; H3K27ac ChIP-seq in hMBs; MYOD ChIP-seq in MYOD GM; DpnII sites; RCF values between a DpnII fragment containing MYOD peak in the promoter of *TGF- $\beta$ 1* (view point – gold eye – see panel B) and an enhancer located at the 3' of the gene after 1 day of doxycycline treatment and 2 days with/out doxycycline treatment (ON/ON, ON/OFF). (Right panel) Data is represented as mean + SEM (n=3).

**F**, ChIP-qPCR analysis for MYOD enrichment on the *TGF- $\beta$ 1* promoter region (top panel) and on the Enhancer region (bottom panel). Data are shown as relative enrichment to EMPTY ON/OFF, as mean +/- SEM (n=2).

T-test was used for statistical analysis, \* p<0.05, \*\* p<0.01.

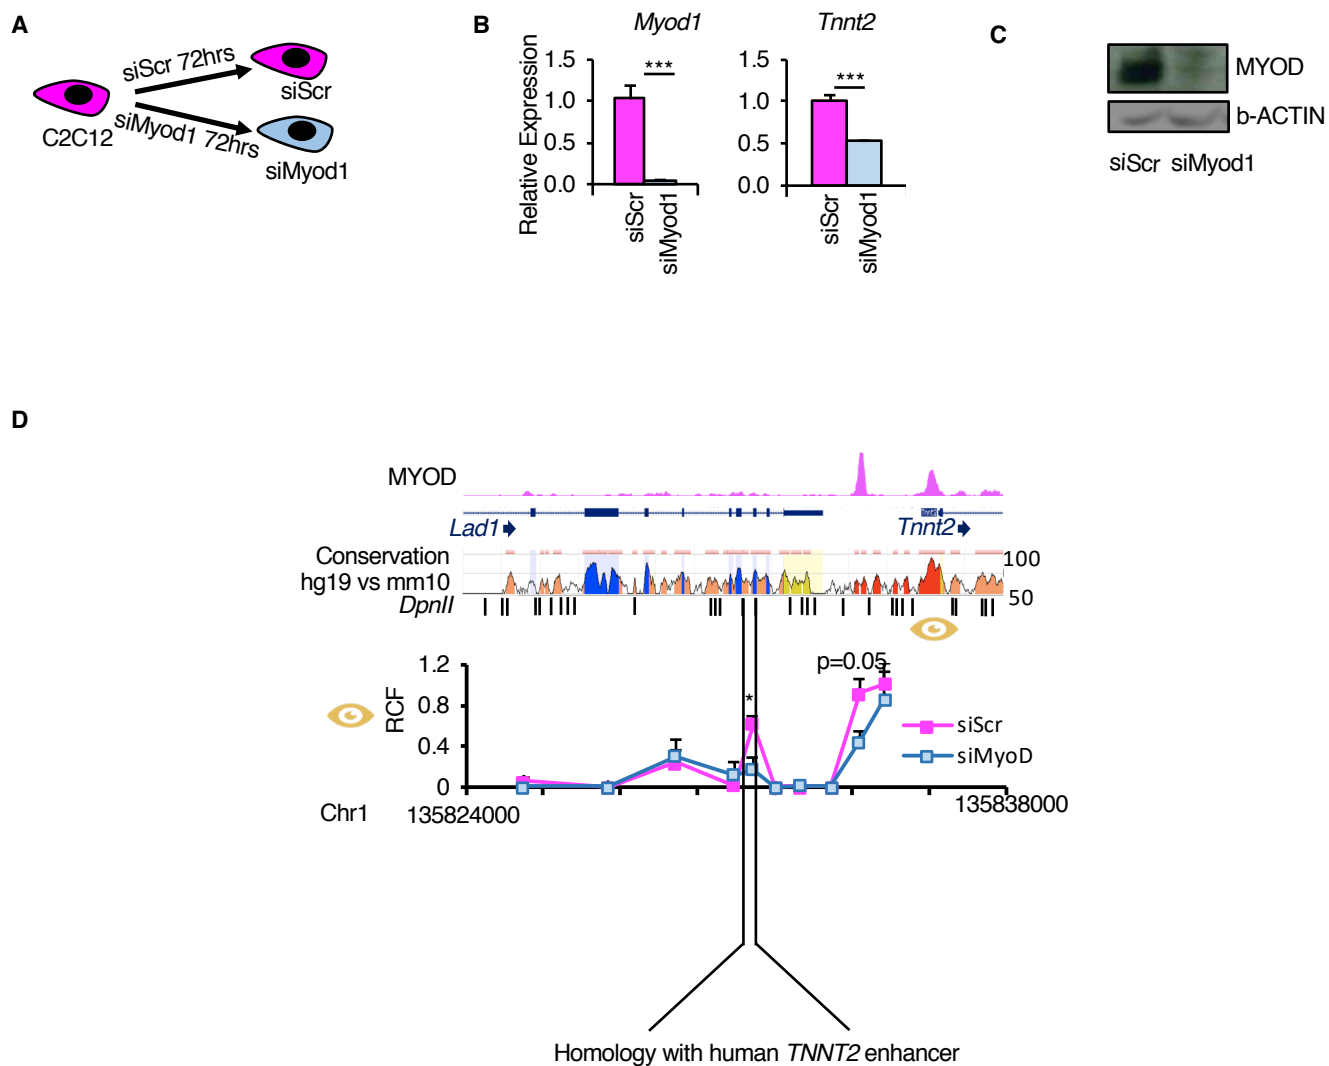

**Figure S7. Related to Fig. 5. MYOD mechanisms to regulate gene expression conserved between human and mouse.**

**A**, Scheme of the experimental approach in C2C12. C2C12 cells were kept non-confluent and transfected with siRNA scramble (siScr) or siRNA targeting *Myod1* (siMyod1) for 72h.

**B**, Relative mRNA expression of *Myod1*, *Tnnt2* (n=3). Data is represented as mean +/- SEM. \*\*\* p<0.001

**C**, Immunoblot analysis of the whole cell lysate. b-ACTIN is used as loading control.

**D**, From top to bottom: UCSC snapshot of MYOD ChIP-seq in C2C12 myoblasts, UCSC genes (arrow indicates transcription direction), conservation levels between human and mouse genomes, DpnII sites, RCF values between MYOD peak at *Tnnt2* promoter (view point - gold eye symbol) and mouse homolog region to the human *TNNT2* enhancer. Data is represented as mean + SEM (n=3).

| Motif | TF         | p-value |
|-------|------------|---------|
|       | CTCF       | 1e-52   |
|       | Boris/CTCF | 1e-23   |
|       | Myf5       | 1e-9    |
|       | MyoG       | 1e-8    |
|       | MyoD       | 1e-8    |
|       | Atoh1      | 1e-7    |
|       | Tcf12      | 1e-7    |
|       | Fli1       | 1e-7    |
|       | NeuroD1    | 1e-6    |
|       | Ap4        | 1e-5    |
|       | Fra2       | 1e-5    |
|       | Tcf21      | 1e-4    |
|       | TEAD2      | 1e-4    |
|       | Jun-AP1    | 1e-4    |
|       | Olig2      | 1e-4    |
|       | Fosl2      | 1e-4    |
|       | Fra1       | 1e-4    |
|       | Ascl1      | 1e-4    |
|       | Bach2      | 1e-4    |
|       | NeuroG2    | 1e-3    |

**Table S2. Related to Fig. 4. Motif analysis at increased IN boundary interactions.**

HOMER motif analysis at the center of MYOD peaks (+/-500bp) that mapped at IN boundaries with strengthened interaction bound by MYOD at both sides during MYOD-mediated commitment

| Motif | TF              | p-value |
|-------|-----------------|---------|
|       | CTCF            | 1e-37   |
|       | Boris/CTCFL     | 1e-23   |
|       | Ap4             | 1e-4    |
|       | KLF6            | 1e-4    |
|       | Elk1            | 1e-4    |
|       | MyoG            | 1e-3    |
|       | Ets1-distal     | 1e-3    |
|       | MyoD            | 1e-3    |
|       | Egr1            | 1e-3    |
|       | KLF14           | 1e-2    |
|       | E2F3            | 1e-2    |
|       | NeuroD1         | 1e-2    |
|       | Sp5             | 1e-2    |
|       | EWS:FLI1-fusion | 1e-2    |
|       | GABPA           | 1e-2    |
|       | Tcf12           | 1e-2    |
|       | Tcf21           | 1e-2    |
|       | Foxo1           | 1e-2    |
|       | Foxa3           | 1e-2    |
|       | Myf5            | 1e-2    |

**Table S3. Related to Fig. 4. Motif analysis at decreased IN boundary interactions.**

HOMER motif analysis at the center of MYOD peaks (+/-500bp) that mapped at IN boundaries with weakened interaction bound by MYOD at both sides during MYOD-mediated commitment

| Primer Name              | Primer Sequence             |
|--------------------------|-----------------------------|
| mouse MYOD mRNA For      | AGCACTACAGTGGCGACTCA        |
| mouse MYOD mRNA Rev      | GGCCGCTGTAATCCATCAT         |
| hGAPDH mRNA For          | GAAGGTGAAGGTCGGAGTC         |
| hGAPDH mRNA Rev          | GAAGATGGTGATGGGATTTTC       |
| hGAPDH premRNA Rev       | CCATACGACTGCAAAGACCC        |
| hbeta-actin mRNA For     | CCTGGGCATGGAGTCCTGTGG       |
| hbeta-actin mRNA Rev     | CTGTGTTGGCGTACAGGTCTT       |
| hMYOG mRNA For           | AATGCAGCTCTCACAGCGCCTC      |
| hMYOG mRNA Rev           | TCAGCCGTGAGCAGATGATCC       |
| hMYHC1 mRNA For          | CGAAGCTGGAGCTACTGTAA        |
| hMYHC1 mRNA Rev          | CCATGTCTCGATCTTGTGATA       |
| hCKM mRNA For            | TGGAGAAGCTCTCTGTGGAAG       |
| hCKM mRNA Rev            | TCCGTCATGCTCTCAGAGGGT       |
| hTGF- $\beta$ 1 mRNA For | GCCTGAGGCCGACTACTA          |
| hTGF- $\beta$ 1 mRNA Rev | CTGTGTGTA CTCTGCTTGA ACT    |
| hCTGF mRNA For           | TGTGCACCGCCAAAGAT           |
| hCTGF mRNA Rev           | GCACGTGCACTGGTACTT          |
| hPOSTN mRNA For          | CTGCTTATTGTTAACCCATATAAACGC |
| hPOSTN mRNA Rev          | CAGACATTTGGGCCTTGGT         |
| hIL6 mRNA For            | CGGGAACGAAAGAGAAGCTCTA      |
| hIL6 mRNA Rev            | GGCGCTTGTGGAGAAGGAG         |
| hVCAM1 mRNA For          | CCGATTGCTGCTCAGATTG         |
| hVCAM1 mRNA Rev          | AGCGTGGAATTGGTCCCCTCA       |
| hIL1b mRNA For           | CATCTACGAATCTCCGACCAC       |
| hIL1b mRNA Rev           | GGCAGGGAACCAGCATCTTC        |
| hTNNT2 mRNA For          | TCAAAGTCCACTCTCTCCATC       |
| hTNNT2 mRNA Rev          | GGAGGAGTCCAAACCAAAGCC       |
| hCTCF mRNA For           | GTGGCGCGGAGAATGATTA         |
| hCTCF mRNA Rev           | AATAGAACCCAGCTCTCAAGC       |
| hITGA7 mRNA For          | CGCCTTCAATCTGGACGTGA        |
| hITGA7 mRNA Rev          | CCCACCAGCAGCCAGC            |
| hRDH5 mRNA For           | TTAGTGTGGGAGGCTGGGAA        |
| hRDH5 mRNA Rev           | GTGGCAGCCTCCTGTGG           |
| hBLOC1S1 mRNA For        | CAGGCACTCAAGGAAATTGGG       |
| hBLOC1S1 mRNA Rev        | GACTGCAGCTGCCCTTTGTA        |
| hLAD1 mRNA For           | CACGGCCATACGGAGATCAG        |
| hLAD1 mRNA Rev           | TTCTCAAAGAGGTGGCGCTT        |
| hTNNI1 mRNA For          | GAGGTGTTCCAACCTGGGAG        |
| hTNNI1 mRNA Rev          | ACGCATACACACCATGCTCA        |
| hPKP1 mRNA For           | ACCGCGTCATCATTCCCTTC        |
| hPKP1 mRNA Rev           | AGCTCAGGTTCTCAAGCAG         |
| hIGFN1 mRNA For          | CAGCTGTACACCCAGGGTAAT       |
| hIGFN1 mRNA Rev          | TCACTCCAGGGATGTGGGAC        |
| hSARNP mRNA For          | TCTTGCTCGTGGTTTGAGA         |
| hSARNP mRNA Rev          | TTTGCCTCCTCTTCAGCATGT       |
| mouse b-actin mRNA For   | GGCTGTATTCCCCTCCATCG        |
| mouse b-actin mRNA Rev   | CCAGTTGGTAACAATGCCATGT      |
| mouse Tnnt2 mRNA For     | CAGAGGAGGCCAACGTAGAAG       |
| mouse Tnnt2 mRNA Rev     | CTCCATCGGGGATCTTGGGT        |

**Table S4. Related to STAR Methods. Primers for gene expression.**

Name and sequence of primers used for RT-qPCR experiments.



| <b>Primer Name</b>           | <b>Primer Sequence</b>   |
|------------------------------|--------------------------|
| hTNNT2 promoter For          | GCAGAGGGCAAGAGTTATGT     |
| hTNNT2 promoter Rev          | AAGGCTGCTCAGTCCATTAG     |
| hTNNT2 enhancer For          | TCACATGCTGTTCCCTCTATTT   |
| hTNNT2 enhancer Rev          | GGTGTCATGGAGCAATTGATTT   |
| hIL6 promoter For            | CTTCGGTCCAGTTGCCTTC      |
| hIL6 promoter Rev            | GCGGCTACATCTTTGGAATCT    |
| hTGF- $\beta$ 1 promoter For | GTCACCAGAGAAAGAGGACCAG   |
| hTGF- $\beta$ 1 promoter Rev | CTACCTTGTTTTCCAGCCTGA    |
| hTGF- $\beta$ 1 enhancer For | CAAAACAGACCCACACA ACTCC  |
| hTGF- $\beta$ 1 enhancer Rev | CAGTGTTTGTCTGTGTGAGGG    |
| hTGF- $\beta$ 1 IN5 For      | CGTCAA AATGTCAA AATGCCGT |
| hTGF- $\beta$ 1 IN5 Rev      | TTACATTCTCAAGCAGGCAGTG   |
| hTGF- $\beta$ 1 IN3 For      | TGAGCTTCAA AACGAGACACAG  |
| hTGF- $\beta$ 1 IN3 Rev      | GGTTGCCCTATTTCTTTGTGGA   |
| hITGA7 promoter For          | ACCCATCACGTCCAGATTGAAG   |
| hITGA7 promoter Rev          | CTCCGGGATTTGCTACCTTTT    |
| hITGA7 enhancer For          | CTGTAGGTC ACTTGGGCTCC    |
| hITGA7 enhancer For          | CGGTGATGAAGACAAAGGCATT   |

**Table S5. Related to STAR Methods. Primers for ChIP-qPCR.**  
Name and sequence of primers used for ChIP-qPCR experiments.

| Primer Name                         | Primer Sequence          | Genomic Coordinates      |
|-------------------------------------|--------------------------|--------------------------|
|                                     |                          | DpnII Fragment           |
| <b>Human hg19</b>                   |                          |                          |
| 3C_LoadingCtrl_F                    | AATGGGCTTAATGGAAGACAAAT  | chr12 6632801 6634701    |
| 3C_LoadingCtrl_R                    | TGTGCTTAAATTCGGTCATCT    | chr12 6632801 6634701    |
| TNNT2_201347539 Viewpoint MYOD peak | GTCATCCCCTAACGGCTTAAAA   | chr1 201346773 201347562 |
| TNNT2_201346763 Viewpoint CTCF peak | GAGCCTTACCTCAGAACAGCAG   | chr1 201345693 201346776 |
| TNNT2_201354973                     | AGTGTACATAAGAGGTCTAGGG   | chr1 201354133 201355158 |
| TNNT2_201356497                     | AAGGTATCATCTGAGCAAAGCAC  | chr1 201355155 201356621 |
| TNNT2_201352732                     | TTCCAAGAAACGTCCCATCAAT   | chr1 201352335 201352895 |
| TNNT2_201351662                     | CTCCTGAAATGACTCCTCCTCTC  | chr1 201350893 201351795 |
| TNNT2_201349564                     | AACTCTCGGCTATGAAGTTGGAA  | chr1 201348865 201349739 |
| TNNT2_201357190                     | CCCCACCTCATAATCCCAAATC   | chr1 201356659 201357298 |
| TNNT2_201354065                     | AAGACATGTCTCCTCCTCTTC    | chr1 201353778 201354136 |
| TNNT2_201353395                     | AGTAAATGTTTCATGGGGCAGATG | chr1 201352950 201353451 |
| TNNT2_201353646                     | CCTTTCCTGTCTAACCTCAAG    | chr1 201353448 201353713 |
| TNNT2_201352338                     | ACAGGAGCCACGAATAACTCAG   | chr1 201351817 201352338 |
| TGF-β1_41946123 Viewpoint IN        | TCTCCACAAAGAAATAGGGCAAC  | chr19 41946101 41946123  |
| TGF-β1_41827968                     | TTGAGAAATGAAGCCCATGTGTC  | chr19 41827946 41827968  |
| TGF-β1_41827078                     | CATCAGGAAAGTGGGAATTGTGA  | chr19 41827056 41827078  |
| TGF-β1_41825348                     | CCTGCATGTTTTCTGTGTTTT    | chr19 41825327 41825348  |
| TGF-β1_41829197                     | TTAGTTCCCATCTCTCCTCTCTG  | chr19 41829175 41829197  |
| TGF-β1_41830037                     | CAACCAGAATTAGAGCCAGACAG  | chr19 41830015 41830037  |
| TGF-β1_41859165 Viewpoint Prom      | TCCCACGGAAATAACCTAGATG   | chr19 41858791 41859165  |
| TGF-β1_41832499                     | CTGAGAACCACAGGAAGCATG    | chr19 41830487 41832499  |
| TGF-β1_41834210                     | GATGTACAGACTGAGTGGGTAAGA | chr19 41832786 41834210  |
| TGF-β1_41835463                     | CACCACAATGCCAGACTAATTTT  | chr19 41834207 41835463  |
| TGF-β1_41838117                     | CCAACTCACCTCTCTGACTTTAC  | chr19 41837557 41838117  |
| ITGA7_56100255 Viewpoint            | ACAGTAGAGGCAGAAGACAGTC   | chr12 56099397 56100255  |
| ITGA7_56112320                      | TAACCACAGCCCATACCTTGAT   | chr12 56111586 56112320  |
| ITGA7_56114416                      | GGAAGTGAAGACTAGCCAGA     | chr12 56112971 56114416  |
| ITGA7_56115224                      | CAGAGAGGCTTCCGAGTCC      | chr12 56114729 56115224  |
| ITGA7_56115639                      | CGGGTGCTGAATGTGAACAC     | chr12 56115321 56115639  |
| <b>Mouse mm10</b>                   |                          |                          |
| 3C_loadingCtrl_mm_F                 | GAACGGTACCACACTCAGTTTAC  | chr5 142911269 142911402 |
| 3C_loadingCtrl_mm_R                 | AGACCTGACTCTTCAAGCTATCA  | chr5 142911269 142911402 |
| Tnnt2_135836700 Viewpoint Myod      | TGTTTCCAGGACAGACTCTAACA  | chr1 135835646 135836700 |
| Tnnt2_135835151                     | CACACATGTCTCAGGATAAGCC   | chr1 135834524 135835151 |
| Tnnt2_135834527 Viewpoint CTCF      | GTGTAGGAGGTGACATTTGAGTG  | chr1 135833823 135834527 |
| Tnnt2_135833826                     | CCCTTTGTCTTAGGCCCTATAGT  | chr1 135833115 135833826 |
| Tnnt2_135832869                     | AGTGCTAGACCTATTTACCGCTC  | chr1 135832431 135832869 |
| Tnnt2_135832434                     | TCCCTTTCCTTGTCTAATTGGC   | chr1 135831572 135832434 |
| Tnnt2_135831575                     | CGTGACATCAAGACTTAACTGT   | chr1 135831231 135831575 |
| Tnnt2_135831234                     | GTAAGTGAAGTCTTGTACACCT   | chr1 135830616 135831234 |
| Tnnt2_135830422                     | GCAAGAGGAGAACAATGACAAGA  | chr1 135828430 135830422 |
| Tnnt2_135828433                     | GGTAGCCTAGACTCCTGTTTTCT  | chr1 135826900 135828433 |
| Tnnt2_135825883                     | CCTGAGTTCAACCACAGATGATG  | chr1 135825088 135825883 |

**Table S6. Related to STAR Methods. Primers for 3C.**

Name and sequence of primers used for 3C experiments and genomic coordinate of the DpnII fragment of interest.

| <b>Name</b> | <b>Sequence</b>      | <b>PAM</b> | <b>Coordinates</b>       |
|-------------|----------------------|------------|--------------------------|
| TNNT2_M1    | CAGCAGCTGCCGACAGATCC | TGG        | chr1 201346758 201346777 |
| TNNT2_M2    | CCACATGGGCTTATATGGCG | TGG        | chr1 201346994 201347013 |
| TNNT2_M3    | TAGCTTATCTGAGCAGCTGG | AGG        | chr1 201347018 201347037 |
| TNNT2_M4    | AGGGCTTTAAGCAGGCATGT | GGG        | chr1 201346829 201346848 |
| ITGA7_CM1   | TGGCTCTGGGAGACGGAACC | AGG        | chr12 56099833 56099852  |
| ITGA7_CM2   | CCCCCTGCTGGAGCAAAAGC | AGG        | chr12 56099774 56099793  |
| ITGA7_CM3   | CCACCTGCAACTCAAAGCT  | AGG        | chr12 56099697 56099716  |
| RDH5_CTCF1  | CTGCCACCTGTAGGTCACTT | GGG        | chr12 56114938 56114957  |
| RDH5_CTCF2  | TTCTGCTGGGTGCCTTACTC | TGG        | chr12 56114982 56115001  |
| RDH5_CTCF3  | GCTTGAGGGCCACAGTAAAC | TGG        | chr12 56114891 56114910  |

**Table S7. Related to STAR Methods. guide RNAs.**

Name and sequence of gRNA DNA template, PAM sequence and genomic coordinates.
